# Supplementary material for: A Spatial Approach for Modeling Amphibian Road-Kills: Comparison of Regression Techniques
Source: MDPI journal article supplement (doi:10.3390/ijgi10050343), 2021-05-18
Supplement: s1 [file s1]

## Supplementary Materials

### A spatial approach for modeling amphibian road-kills: comparison of regression techniques

Diana Sousa-Guedes\*, Marc Franch and Neftalí Sillero

\* Correspondence: dianasguedes@gmail.com

ISPRS International Journal of Geo-Information

Table S1. Coefficient estimates and significance of environmental variables in each one of the 10 models calculated with GLM. Asterisks denote for significance. D\_urb: distance to urban areas; D\_broad: distance to broadleaved forests; D\_conif: distance to coniferous forests; D\_water: distance to water bodies.

| Model | Intercept | D_urb     | D_broad   | D_conif   | D_water   | Slope     |
|-------|-----------|-----------|-----------|-----------|-----------|-----------|
| 1     | 5.830***  | -0.000*** | -0.000*** | -0.000*** | -0.000*** | -0.041*** |
| 2     | 5.771***  | -0.000*** | -0.000*** | -0.000*** | -0.000*** | -0.042*** |
| 3     | 5.844***  | -0.000*** | -0.000*** | -0.000*** | -0.000*** | -0.045*** |
| 4     | 5.198***  | -0.000*** | -0.000*** | -0.000*** | -0.000*** | -0.029**  |
| 5     | 6.128***  | -0.000*** | -0.000*** | -0.000*** | -0.000*** | -0.047*** |
| 6     | 5.752***  | -0.000*** | -0.000*** | -0.000*** | -0.000*** | -0.039*** |
| 7     | 5.372***  | -0.000*** | -0.000*** | -0.000*** | -0.000*** | -0.043*** |
| 8     | 6.003***  | -0.000*** | -0.000*** | -0.000*** | -0.000*** | -0.048*** |
| 9     | 6.113***  | -0.000*** | -0.000*** | -0.000*** | -0.000*** | -0.044*** |
| 10    | 5.601***  | -0.000*** | -0.000*** | -0.000*** | -0.000*** | -0.042*** |

\*\*\*p< 0.001; \*\*p<0.01; \*p<0.05

Table S2. p-values and significance of environmental variables in each one of the 10 models calculated with GAM. Asterisks denote for significance. D\_urb: distance to urban areas; D\_broad: distance to broadleaved forests; D\_conif: distance to coniferous forests; D\_water: distance to water bodies.

| Model | Intercept | D_urb      | D_broad    | D_conif    | D_water  | Slope      |
|-------|-----------|------------|------------|------------|----------|------------|
| 1     | 0.736     | <0.001 *** | 0.009 **   | <0.001 *** | 0.378    | <0.001 *** |
| 2     | 0.801     | <0.001 *** | 0.005 **   | <0.001 *** | 0.182    | <0.001 *** |
| 3     | 0.798     | <0.001 *** | 0.014 *    | <0.001 *** | 0.332    | <0.001 *** |
| 4     | 0.280     | <0.001 *** | 0.003 **   | <0.001 *** | 0.174    | <0.001 *** |
| 5     | 0.637     | <0.001 *** | 0.005 **   | <0.001 *** | 0.093    | <0.001 *** |
| 6     | 0.480     | <0.001 *** | 0.007 **   | <0.001 *** | 0.071    | <0.001 *** |
| 7     | 0.653     | <0.001 *** | 0.034 *    | <0.001 *** | 0.668    | <0.001 *** |
| 8     | 0.226     | <0.001 *** | <0.001 *** | <0.001 *** | 0.009 ** | <0.001 *** |
| 9     | 0.946     | <0.001 *** | 0.004 **   | <0.001 *** | 0.026 *  | <0.001 *** |
| 10    | 0.831     | <0.001 *** | 0.016 *    | <0.001 *** | 0.337    | <0.001 *** |

\*\*\*p< 0.001; \*\*p<0.01; \*p<0.05

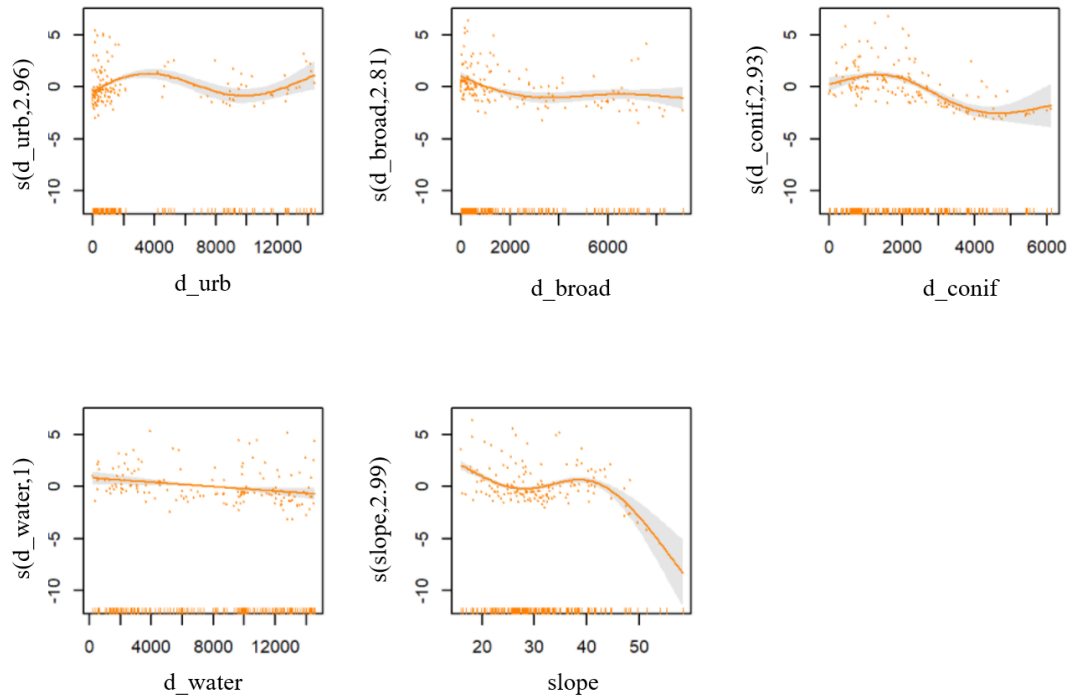

Figure S1. Response curves of the five explanatory variables of the GAM model with the best performance. d\_urb: distance to urban areas; d\_broad: distance to broadleaved forests; d\_conif: distance to coniferous forests; d\_water: distance to water bodies.

Table S3. Importance of environmental variables in each one of the 10 models calculated with RF. In bold, the most important variable in each model. D\_urb: distance to urban areas; D\_broad: distance to broadleaved forests; D\_conif: distance to coniferous forests; D\_water: distance to water bodies.

| Model | D_urb | D_broad | D_conif | D_water      | Slope        |
|-------|-------|---------|---------|--------------|--------------|
| 1     | 375.3 | 453.3   | 453.7   | 490.9        | <b>549.0</b> |
| 2     | 412.4 | 470.2   | 420.3   | 492.0        | <b>535.5</b> |
| 3     | 367.7 | 412.5   | 413.7   | 427.9        | <b>576.9</b> |
| 4     | 309.7 | 359.2   | 374.2   | 395.3        | <b>446.3</b> |
| 5     | 365.3 | 453.1   | 429.6   | 492.0        | <b>612.6</b> |
| 6     | 348.9 | 480.5   | 453.9   | 449.9        | <b>546.2</b> |
| 7     | 349.1 | 466.7   | 407.3   | 375.4        | <b>508.0</b> |
| 8     | 366.0 | 445.9   | 446.0   | 468.7        | <b>663.1</b> |
| 9     | 270.7 | 307.1   | 308.3   | <b>353.2</b> | 332.5        |
| 10    | 352.1 | 433.2   | 432.2   | 468.8        | <b>577.5</b> |

Table S4. Relative influence (%) of environmental variables in each one of the 10 models calculated with BRT. In bold, the most important variable in each model. D\_urb: distance to urban areas; D\_broad: distance to broadleaved forests; D\_conif: distance to coniferous forests; D\_water: distance to water bodies.

| Model | D_urb | D_broad | D_conif     | D_water | Slope       |
|-------|-------|---------|-------------|---------|-------------|
| 1     | 24.5  | 14.4    | 18.6        | 11.9    | <b>30.6</b> |
| 2     | 24.1  | 15.2    | 19.0        | 11.8    | <b>30.0</b> |
| 3     | 23.4  | 16.2    | 17.7        | 10.8    | <b>31.9</b> |
| 4     | 22.9  | 13.6    | 26.0        | 10.9    | <b>26.7</b> |
| 5     | 21.5  | 16.0    | 19.9        | 11.4    | <b>31.1</b> |
| 6     | 23.6  | 16.2    | 21.5        | 11.1    | <b>27.7</b> |
| 7     | 22.3  | 16.4    | 20.5        | 9.6     | <b>31.2</b> |
| 8     | 22.8  | 13.5    | 21.2        | 10.7    | <b>31.8</b> |
| 9     | 22.3  | 13.4    | <b>26.0</b> | 15.6    | 22.7        |
| 10    | 24.2  | 15.2    | 18.7        | 10.6    | <b>31.4</b> |

Table S5. Mean estimated coefficients and significance of environmental variables in each one of the 10 models calculated with GWR. Asterisks denote for significance. D\_urb: distance to urban areas; D\_broad: distance to broadleaved forests; D\_conif: distance to coniferous forests; D\_water: distance to water bodies.

| Model | Intercept | D_urb | D_broad  | D_conif  | D_water | Slope   |
|-------|-----------|-------|----------|----------|---------|---------|
| 1     | 8.702**   | 0.001 | -0.001 * | -0.001** | -0.000  | -0.064* |
| 2     | 8.769**   | 0.001 | -0.001   | -0.001** | -0.000  | -0.061  |
| 3     | 9.095**   | 0.001 | -0.001   | -0.001** | -0.000  | -0.070* |
| 4     | 8.804**   | 0.001 | -0.001   | -0.001** | -0.000  | -0.053  |
| 5     | 8.272**   | 0.001 | -0.001   | -0.001** | -0.000  | -0.070* |
| 6     | 10.342*** | 0.001 | -0.002*  | -0.001** | -0.000* | -0.065  |
| 7     | 8.500**   | 0.001 | -0.001   | -0.001** | -0.000  | -0.061  |
| 8     | 9.385**   | 0.001 | -0.001   | -0.001** | -0.000* | -0.069  |
| 9     | 8.900**   | 0.001 | -0.001   | -0.001** | -0.000  | -0.062  |
| 10    | 8.389**   | 0.001 | -0.001   | -0.001*  | -0.000  | -0.073* |

\*\*\*p< 0.001; \*\*p<0.01; \*p<0.05
